# Supplementary material for: Genome-wide analysis to identify a novel microRNA signature that predicts survival in patients with stomach adenocarcinoma
Source: PubMed Central journal article supplement (PMC6856753; doi:10.7150/jca.33250), 2019-10-17
Supplement: jcav10p6298s1.pdf [file jcav10p6298s1.pdf]

## **Supplementary material**

### **Supplementary Tables**

**Table S1.** Illustrated the multivariable survival analysis results of miRNAs.

**Table S2.** Illustrated the multivariable survival analysis results of these prognostic miRNAs targeted genes.

**Table S3.** Showed the GSEA results of c2 (c2.all.v6.1.symbols) reference gene sets for higher risk groups in those patients who are suffering from STAD.

**Table S4.** Showed the GSEA results of c5 (c5.all.v6.1.symbols) reference gene sets for higher risk groups in those patients suffering from STAD.

### **Supplementary Figures**

**Figure S1.** Directed acyclic graph of miRNA-targeted gene that generated by BiNGO.

**Figure S2.** Protein–protein interaction networks of miRNA-targeted gene that generated by SRTING.

**Figure S3.** Gene-gene interaction networks of miRNA-targeted gene that generated by GeneMANIA.

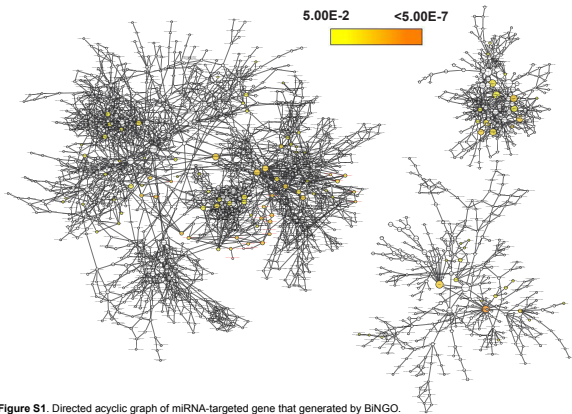

**Figure S1.** Directed acyclic graph of miRNA-targeted gene that generated by BiNGO.

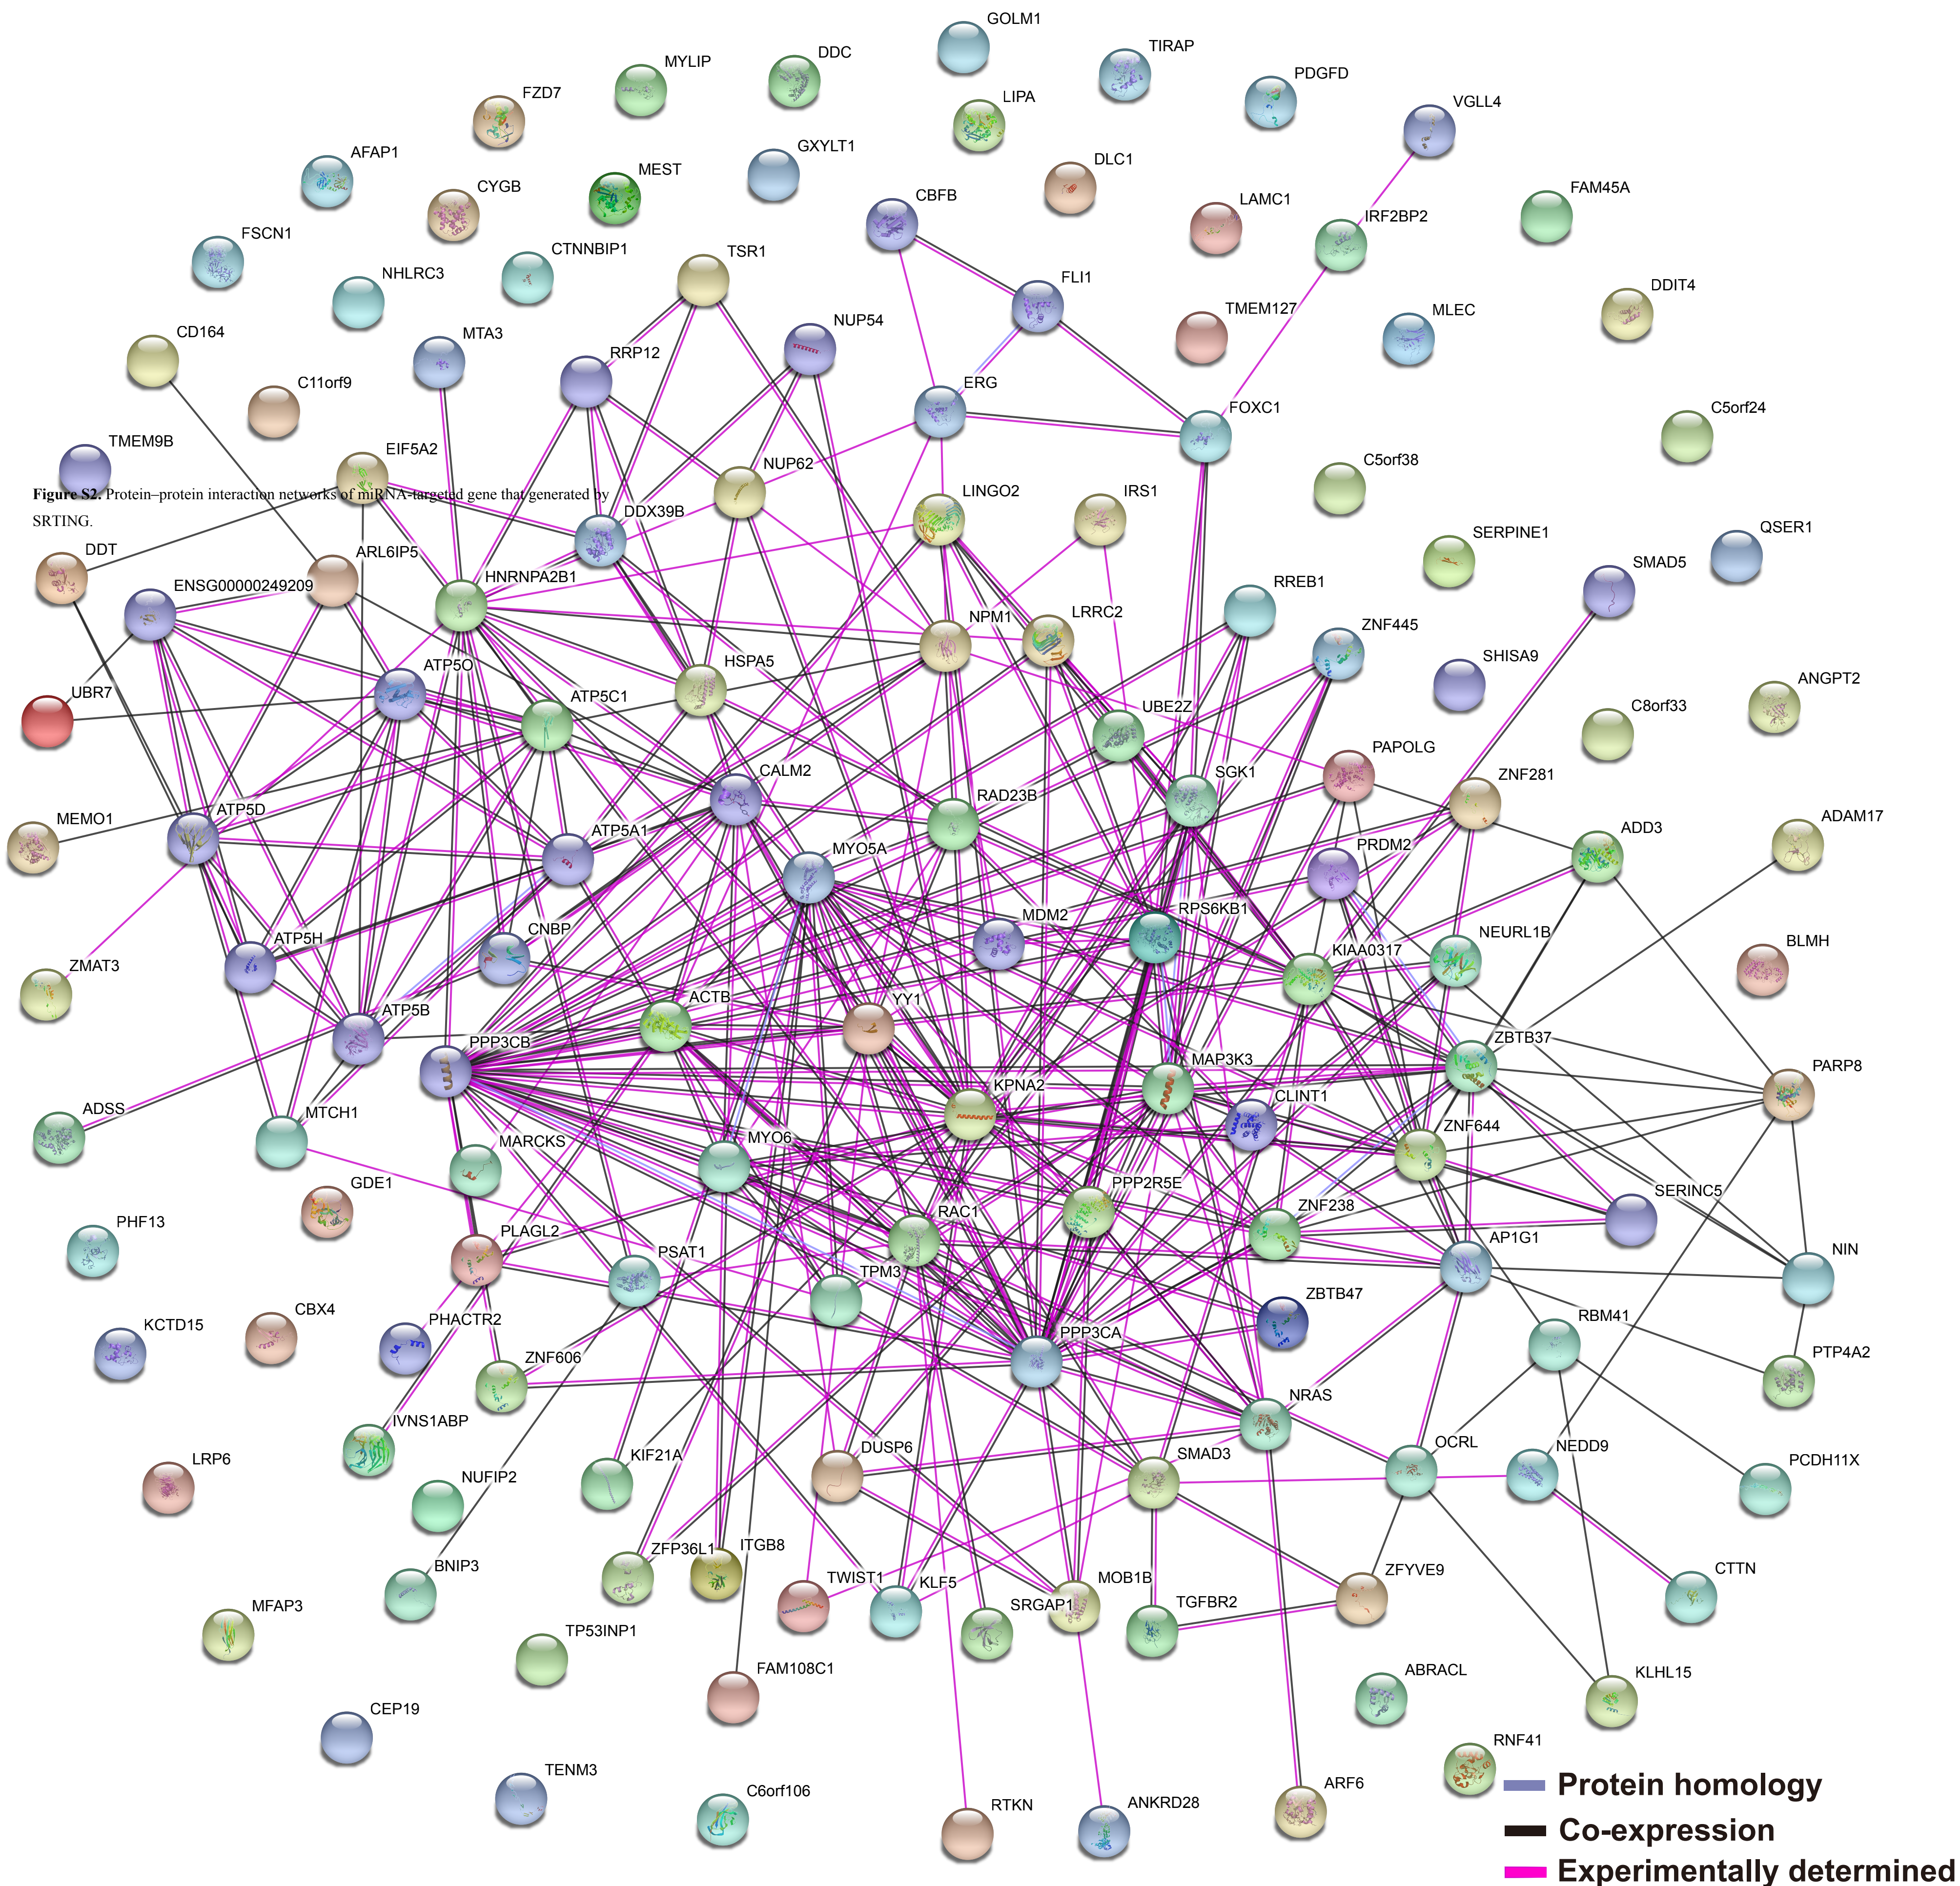

**Figure S2. Protein-protein interaction networks of miRNA-targeted gene that generated by SRTING.**

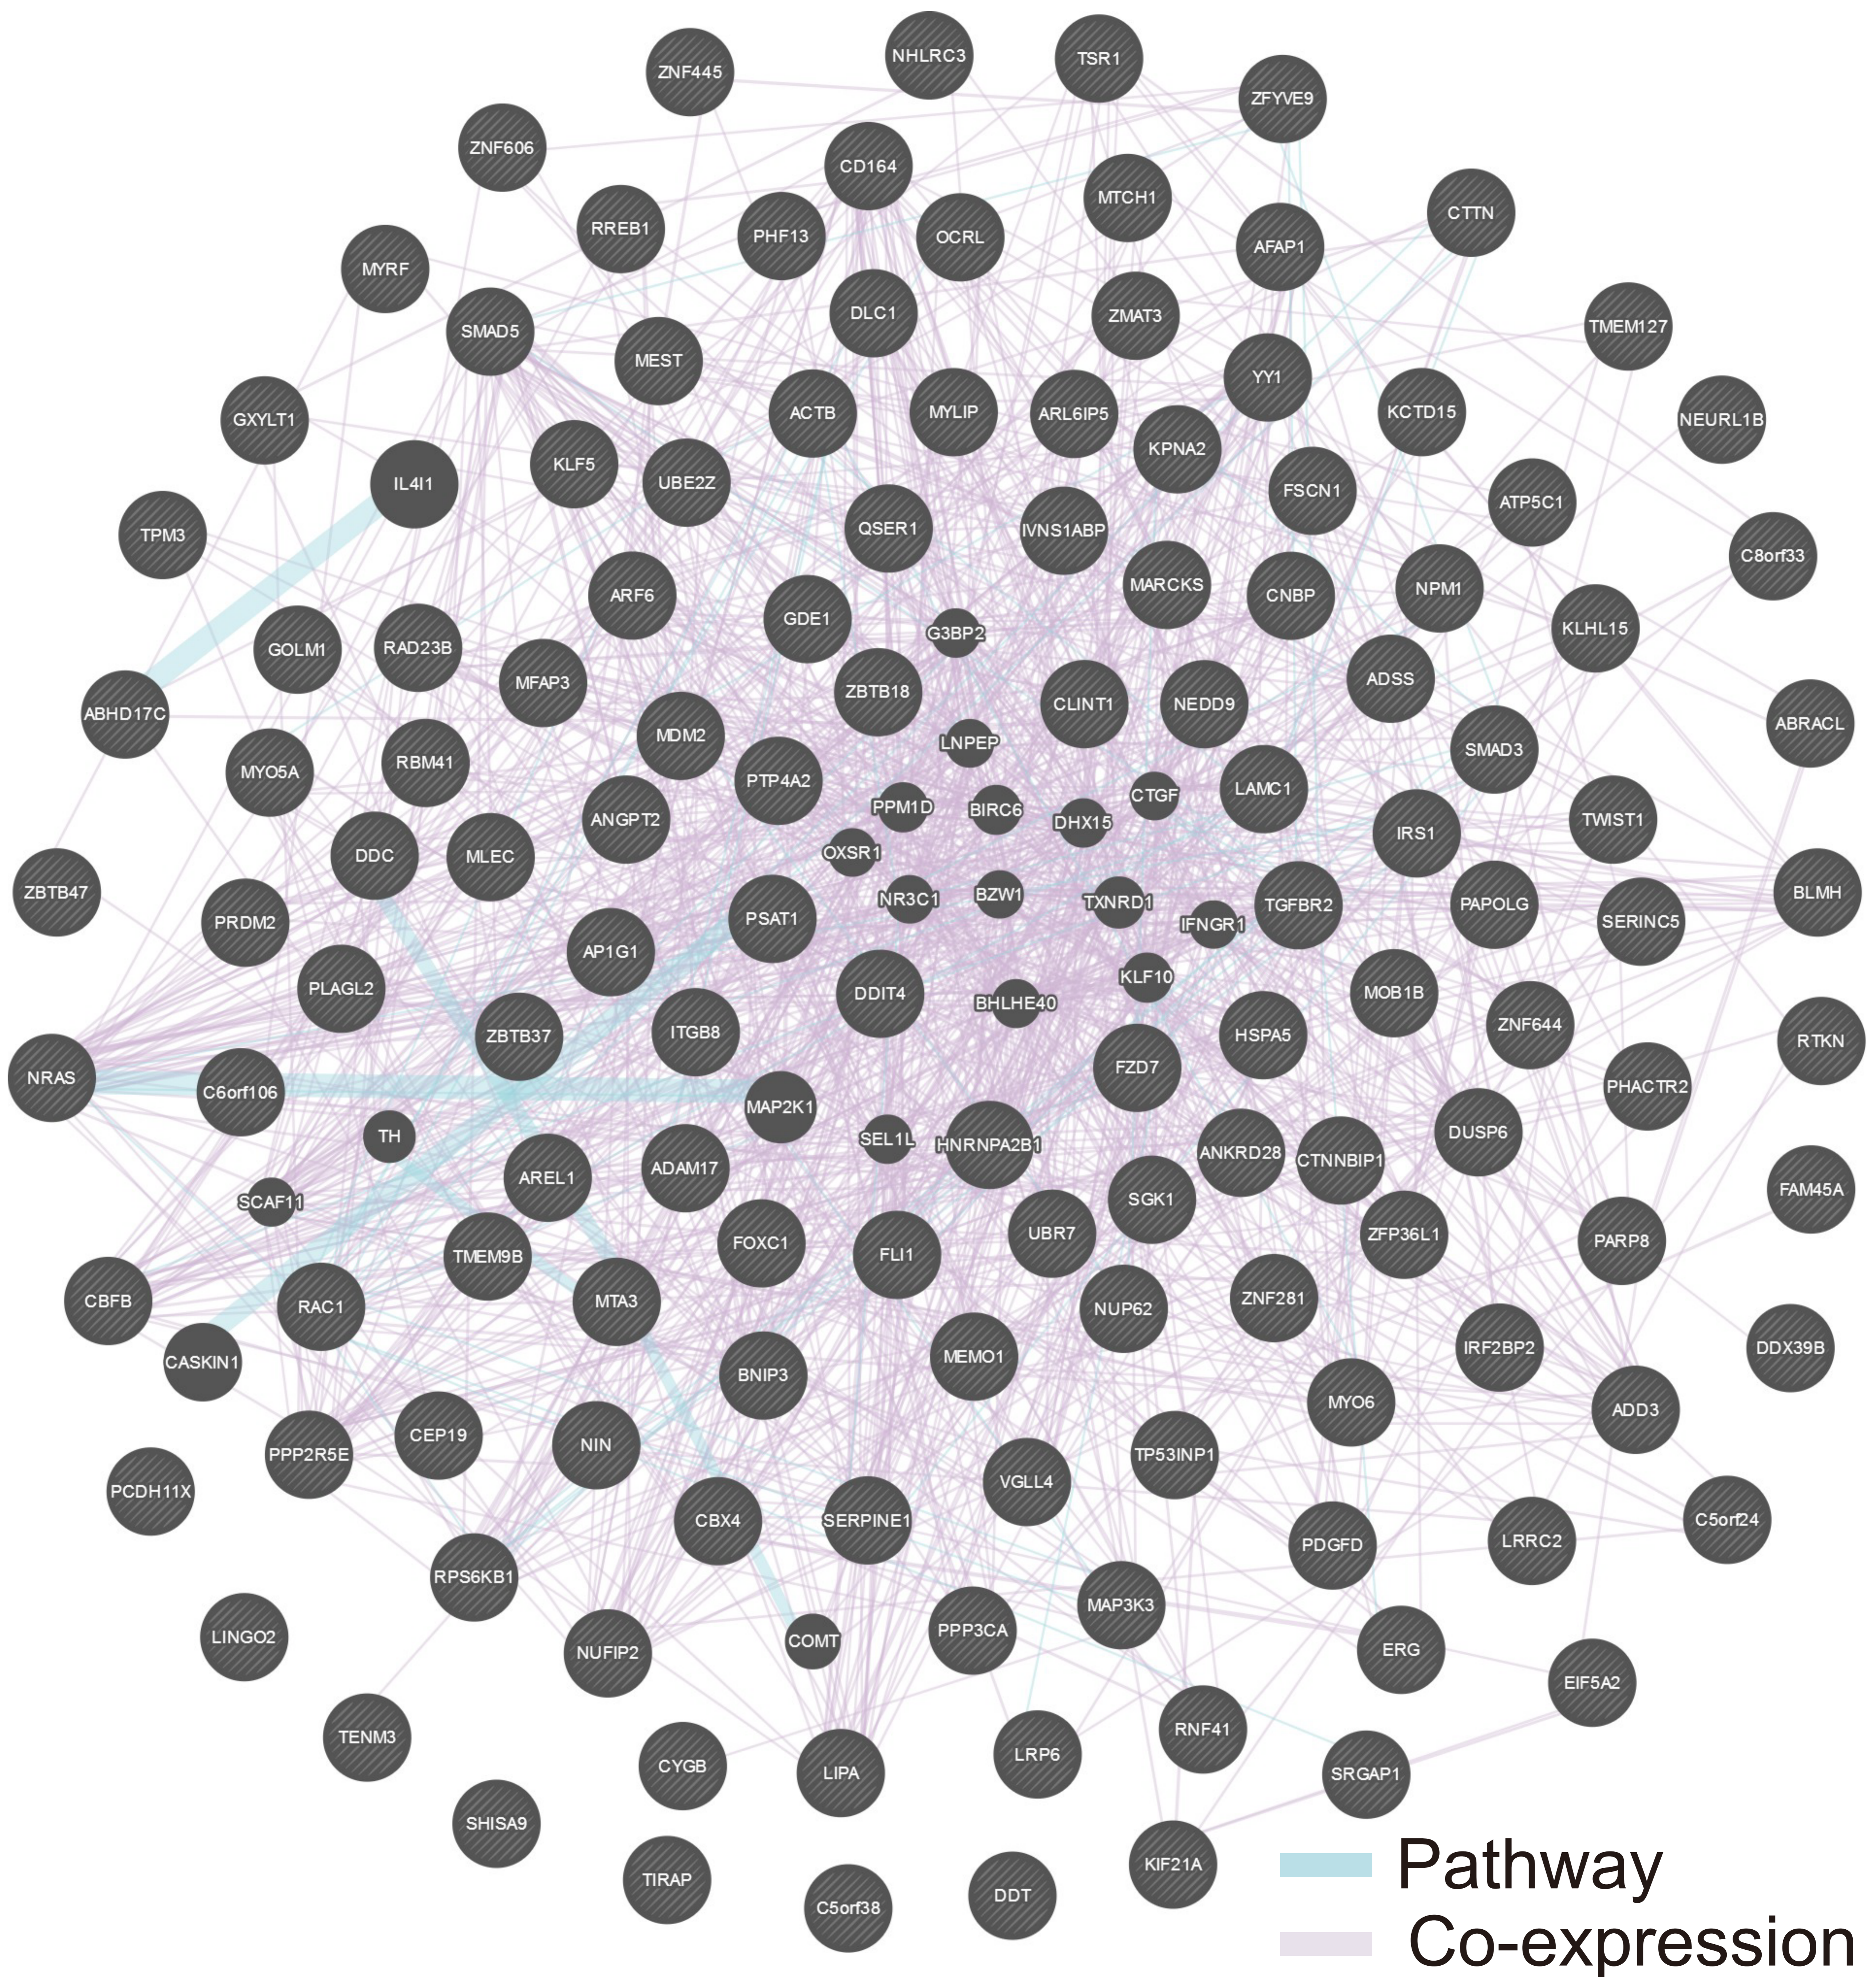

**Figure S3.** Gene-gene interaction networks of miRNA-targeted gene that generated by GeneMANIA.
